# Supplementary material
Source: Springer Nature journal article supplement (https://www.springermedizin.de/resource/supplementary/12936_2008_653_MOESM3_ESM.pdf/9547922)

## Bel air

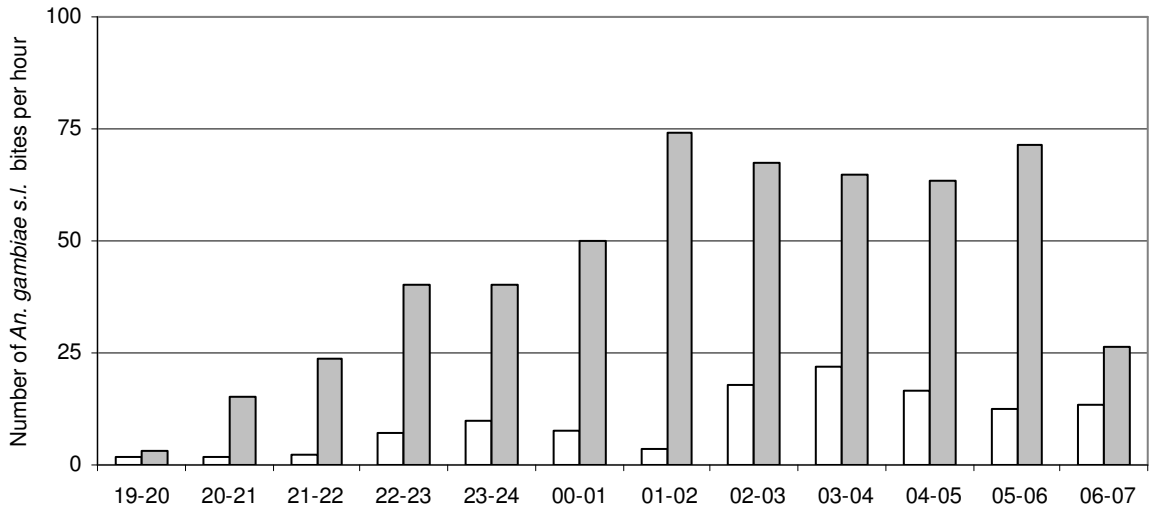

## Ouakam

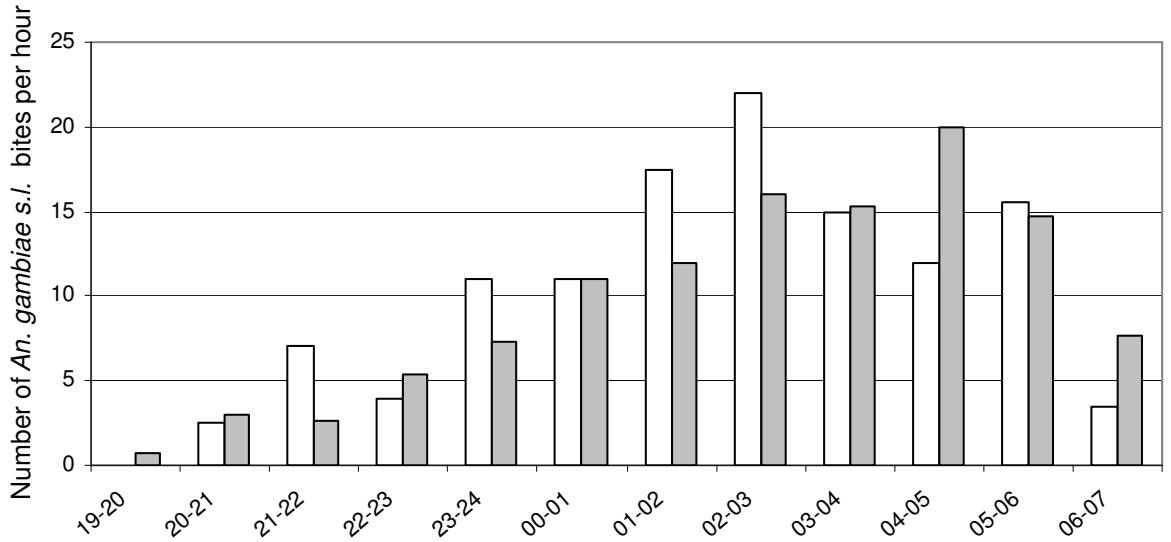

Supplement: MOESM3 [file 9547922]
